# Supplementary material
Source: publisher site journal article supplement (https://www.dovepress.com/article/546926)
Supplement: Supplementary file 1 [file 546926%20Supplementary%20Material.docx]

The semi-structured interview guide was organized into five main sections. Each section was informed by one or more constructs derived from the Health Belief Model (HBM) and Affordance Theory. While not every question directly corresponds to a single theoretical element, the overall design ensured comprehensive thematic coverage and theoretical relevance. The table below summarizes the key areas and their theoretical underpinnings.

Table S1 Interview Guide Structure and Theoretical Mapping

| **Section** | **Key Focus** | **Illustrative Topics or Questions** | **Theoretical Mapping** | |
| --- | --- | --- | --- | --- |
| 1. Warm-up and Context | Understanding patients’ treatment history, routines, and medication adherence behaviors | “How long have you been taking TB medication?” “Have you ever forgotten to take your medicine? What happened?” | | Contextual grounding (not theory-driven) |
| 2. Health Belief Model | Exploring perceptions of illness, treatment, and personal ability to manage the condition | “Do you believe that taking your medication regularly affects your recovery?” “Do you find it difficult to follow the treatment schedule?” | | HBM: Perceived severity, perceived benefits, perceived barriers, self-efficacy |
| 3. Affordance Theory | Eliciting initial responses, expectations, and concerns regarding the proposed AI-assisted remote system | “What do you think about a system that reminds you to take medicine and monitors your health remotely?” | | HBM: Cues to action Affordance Theory: Perceived action possibilities, e.g., reminders, support, automation |
| 4. Support vs. Surveillance | Probing emotional and ethical concerns, especially regarding data use, privacy, and autonomy | “Would you feel comfortable being monitored every day through your phone?” “Do you think this kind of technology would help you or make you feel watched?” | | Affordance Theory: Enabling vs. constraining perceptions (e.g., autonomy, intrusion, discretion) HBM: Perceived barriers (psychosocial dimension) |
| 5. Closing and Recommendations | Identifying patients’ preferences for future system features and areas of concern | “What do you hope this system would avoid doing?” “What features would you most like it to include?” | | User-centered needs identification (linked to design implications) |

**Section 1: Warm-up & Context**

1.Could you briefly describe your treatment experience—for example, when you started treatment, and whether you are still taking medication or undergoing follow-up?

2.During your treatment, how have you usually received follow-up or care management? (e.g., going to the hospital, phone calls, home visits from community doctors)

3.What aspects of treatment management have you found particularly difficult or helpful?

**Section 2: Health Belief Model**

Transition: Based on your own experience, we would now like to hear your thoughts on how this AI system might play a role in treatment.

4. During your treatment, have you ever found it hard to remember to take your medication or had difficulty sticking to the schedule? (Self-efficacy, behavioral motivation)

5. How do you perceive tuberculosis? Do you think it significantly affects your health or daily life? (Perceived severity)

6. If the AI system could remind you to take your medication and notify you when to return for check-ups, do you think that would be helpful? (Perceived benefits)

7. What concerns might you have about using such a system—for example, operational difficulties, over-reliance on devices, or discomfort with the technology? (Perceived barriers)

8. If the system predicted a risk of relapse or health deterioration, would you trust it? Would it influence your actions? (Perceived benefits + self-efficacy)

**Section 3: Affordance Theory**

Transition: The following functions are part of the AI system we introduced earlier. We'd like to understand your opinions on these features.

9. This system can automatically remind you to take your medication. Do you think it could replace reminders from doctors or family members? (Substitutive affordance)

10. The system can offer personalized health advice based on your health data. Do you view this advice as a helpful tool or as a form of control? (Authoritative vs. autonomous affordance)

11. The system monitors your health remotely—such as medication use, coughing frequency, and temperature. Do you see this as helpful or as feeling “watched”? (Monitoring vs. protective affordance)

12. Do you think using this system would help conceal your condition or make it more exposed? (Privacy/stigma-related affordance)

13. If you could complete follow-up appointments and receive reminders through the system without visiting the hospital, would that reduce your burden or lead to a lack of necessary human contact? (Substitution vs. emotional gap affordance)

**Section 4: Support and Surveillance (Core Theme)**

Transition: Some people feel this system provides strong support, while others feel it acts more like surveillance. We'd like to hear your honest opinion.

14. Do you feel the system is more like “helping you manage yourself” or “someone watching over you”?

15. Do you feel stressed or uncomfortable when using it—for example, due to “check-in” tasks or system notifications?

16. Are there features or design aspects that would make you more willing to use it, such as more humanized design, privacy protection, or flexible choices?

**Section 5: Closing and Recommendations**

17. If this system were to be used in the future to help patients like yourself, what is one thing you would definitely not want it to do?

18. And what is one thing you believe it must include?
